# Supplementary material for: Galectin-3 impacts Cryptococcus neoformans infection through direct antifungal effects
Source: PubMed Central journal article supplement (PMC5719036; doi:10.1038/s41467-017-02126-7), 2017-12-06
Supplement: 41467_2017_2126_MOESM1_ESM.pdf [file 41467_2017_2126_MOESM1_ESM.pdf]

1

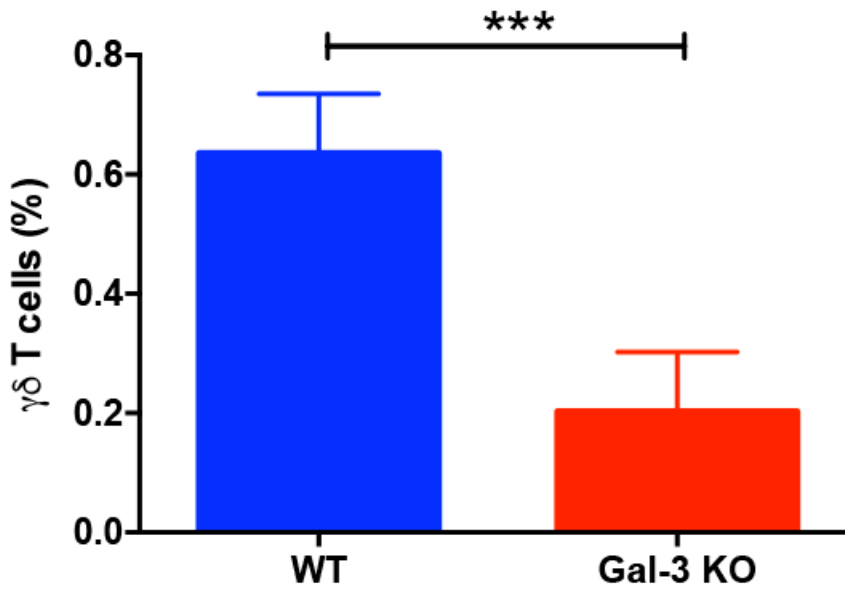

2

3 **Supplementary Figure 1. Evaluation of  $\gamma\delta$  T cells population in WT and Gal-3**  
4 **KO mice during experimental pulmonary cryptococcosis.** WT (blue bar) and Gal-  
5 3 KO (red bar) mice infected with *C. neoformans* were sacrificed on day 3 post-  
6 infection and leukocytes were probed for the presence of the  $\gamma\delta$  T-cell receptor. The  
7 bars represent means  $\pm$  standard deviations. \*\*\* $P$ <0.001, unpaired Student's t-test, 5  
8 mice per group. Data are representative of three experiments.

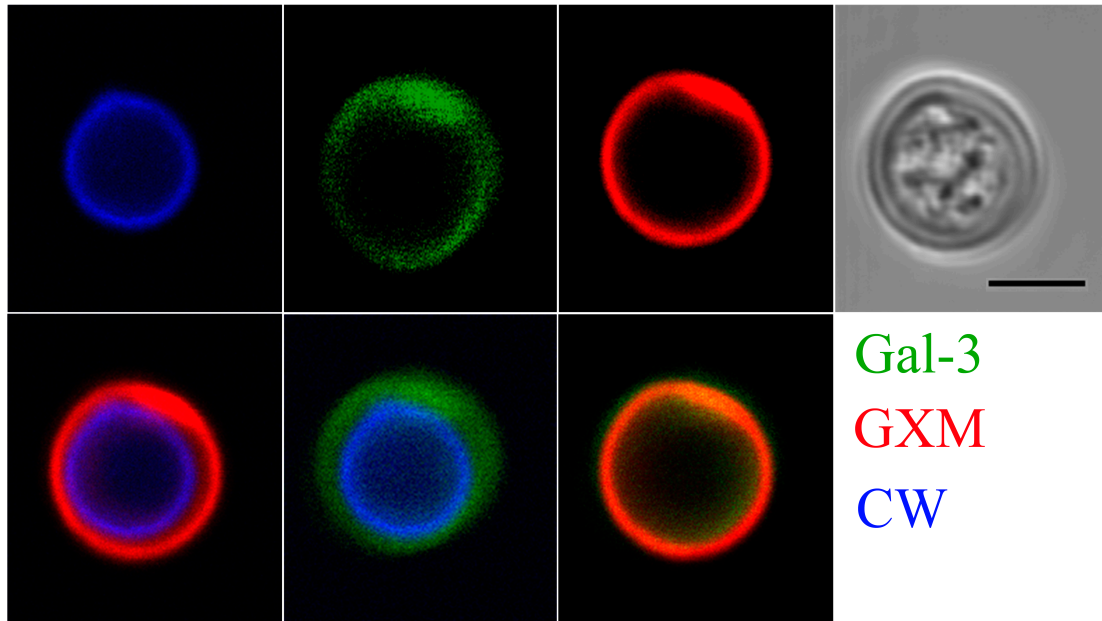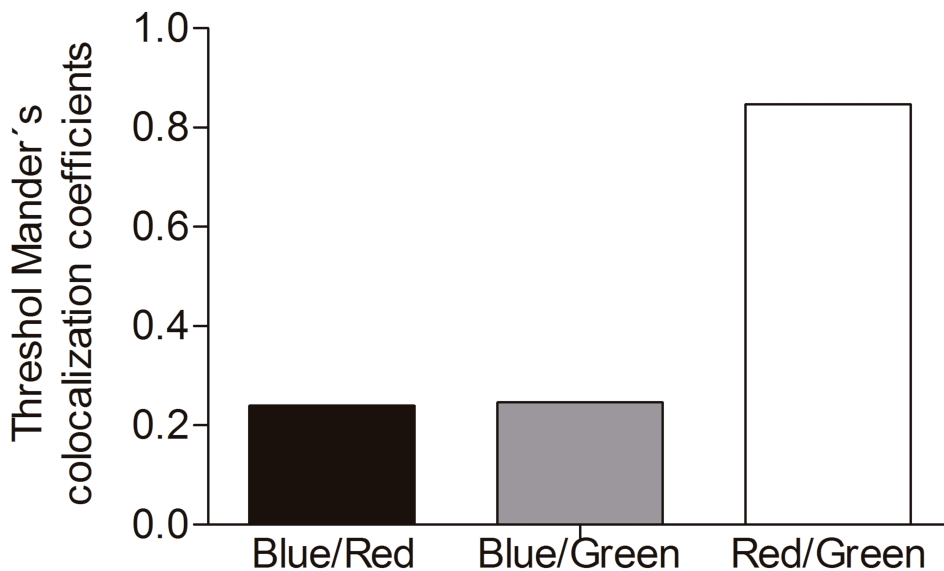

9

10 **Supplementary Figure 2. Cellular binding sites of Gal-3 in *C. neoformans*.**

11 Cellular structures analyzed by fluorescence microscopy included cell wall  
 12 (calcofluor white, CW, blue fluorescence; A), Gal-3 binding sites (anti-Gal-3  
 13 antibody, green fluorescence; B), and capsule (18B7 antibody, GXM, red  
 14 fluorescence; C). Merged images are shown in E (capsule and cell wall), F (Gal-3 and  
 15 cell wall) and G (Gal-3 and capsule). *C. neoformans* is also illustrated under DIC (D).  
 16 The images represent a single section from a Z series stack. Scale bar = 3  $\mu$ m. Co-  
 17 localization of Gal-3 binding sites with capsular structures was confirmed by the

18 threshold Mander's coefficient tool available in the Fiji J software (H). The whole  
19 image field was used to obtain the split threshold Mander's colocalization coefficient  
20 for each channel (Tm1/Tm2).

21

22
