# Supplementary material for: Galectin-3 impacts Cryptococcus neoformans infection through direct antifungal effects
Source: PubMed Central journal article supplement (PMC5719036; doi:10.1038/s41467-017-02126-7), 2017-12-06
Supplement: 41467_2017_2126_MOESM2_ESM.pdf [file 41467_2017_2126_MOESM2_ESM.pdf]

## **Description of Additional Supplementary Files**

File Name: Supplementary Data 1

Description: Up regulated genes with annotated functions in *C. neoformans* upon exposure to Gal-3.

File Name: Supplementary Data 2

Description: Down regulated genes with annotated functions in *C. neoformans* upon exposure to Gal-3.

File Name: Supplementary Data 3

Description: Up regulated genes with hypothetical functions in *C. neoformans* upon exposure to Gal-3.

File Name: Supplementary Data 4

Description: Down regulated genes with hypothetical functions in *C. neoformans* upon exposure to Gal-3.
